# Supplementary material for: A phase I/II study on intracerebroventricular tralesinidase alfa in patients with Sanfilippo syndrome type B
Source: PubMed Central journal article supplement (PMC9843052; doi:10.1172/jci165076), 2023-01-17
Supplement: jci-133-165076-s088.pdf [file jci-133-165076-s088.pdf]

**Supplemental Table 1. CSF HS-NRE in individual subjects over the course of study 250-201<sup>A</sup>**

| Treatment Week | 9001 | 9002 | 9003  | 9004           | 9005  | 9006  | 9007 | 9008  | 9009 | 9010  | 9011  | 9012  | 9013 | 9014 | 9015 | 9017  | 9018 | 9019 | 9020 | 9021 | 9022 | 9023  |
|----------------|------|------|-------|----------------|-------|-------|------|-------|------|-------|-------|-------|------|------|------|-------|------|------|------|------|------|-------|
| 1 (Part 1)     | 48.0 | 48.1 | 104.6 | Not applicable |       |       |      |       |      |       |       |       |      |      |      |       |      |      |      |      |      |       |
| 1 (Part 2)     | 5.5  | 5.0  | 24.3  | 164.2          | 114.3 | 182.1 | 52.7 | 321.3 | 94.7 | 114.7 | 105.1 | 132.6 | 83.0 | 89.5 | 60.9 | 125.4 | 36.7 | 70.1 | 61.6 | 69.4 | 90.6 | 103.7 |
| 2              |      | 5.0  |       |                | 16.2  |       | 19.9 |       |      | 40.2  | 45.3  | 28.0  | 29.6 |      | 21.0 | 52.3  |      |      | 13.2 | 20.6 | 24.4 | 20.7  |
| 3              | 5.7  | 5.0  | 24.5  | 19.1           |       | 16.3  | 16.5 | 35.0  | 15.0 | 36.0  | 22.3  | 11.8  | 8.6  | 28.1 | 10.5 | 19.4  | 6.4  | 9.7  | 7.0  | 11.7 |      | 9.8   |
| 4              | 6.5  | 5.0  | 23.1  | 12.8           | 10.6  | 9.5   | 6.7  |       | 9.3  | 27.1  | 13.6  | 5.8   | 8.7  | 8.3  | 8.9  | 20.3  |      | 5.0  | 8.1  | 7.6  | 15.5 | 7.6   |
| 5              | 6.2  | 5.0  | 11.7  | 11.2           | 8.9   |       | 7.7  | 13.3  | 8.4  | 11.8  | 10.1  | 5.0   | 5.6  | 12.2 | 13.7 | 8.8   |      | 9.1  | 5.0  | 5.0  | 10.6 | 6.3   |
| 6              | 5.0  | 5.0  |       |                |       | 9.8   | 5.4  | 9.9   | 8.6  | 8.7   | 5.6   | 5.0   | 5.9  | 5.0  | 9.2  | 10.4  |      | 6.1  |      | 5.0  | 15.2 | 5.4   |
| 7              | 5.0  | 5.0  | 13.3  | 7.7            | 5.4   | 6.3   | 5.0  | 9.2   | 7.1  | 6.2   | 6.5   | 5.0   | 5.0  | 13.5 | 10.0 | 11.8  |      | 5.1  | 11.9 | 6.4  | 18.6 | 6.1   |
| 8              | 7.3  | 5.0  | 32.1  | 7.4            | 5.2   | 5.7   | 5.7  | 9.8   | 8.3  | 6.1   | 6.6   | 5.0   | 5.9  | 8.2  | 9.3  | 15.5  |      | 9.8  | 16.8 | 5.0  | 20.4 | 5.4   |
| 12             | 6.6  | 5.0  | 14.0  | 8.8            | 5.0   | 5.0   | 6.4  | 10.0  | 7.2  | 6.7   | 5.0   | 5.0   | 5.0  | 6.9  | 10.2 |       |      | 29.7 | 5.7  | 5.9  | 20.8 | 7.2   |
| 16             | 6.5  | 5.0  | 26.8  | 8.8            | 5.0   | 5.0   | 9.5  | 8.2   | 5.1  | 10.4  | 6.4   | 7.7   | 5.0  | 7.2  | 10.4 |       | 24.4 | 9.1  | 5.0  | 6.9  |      | 6.9   |
| 20             | 8.3  | 5.0  | 15.9  | 9.4            | 5.0   | 5.0   | 8.4  | 24.3  | 5.4  | 8.0   | 6.3   |       | 7.3  | 6.2  | 8.8  |       | 5.0  | 14.7 |      | 5.9  |      | 7.3   |
| 24             | 6.1  | 5.0  | 8.1   | 7.9            | 5.0   |       | 7.7  | 7.4   | 5.0  | 5.0   | 6.4   | 18.2  | 6.7  | 7.9  | 16.4 |       | 5.0  | 8.0  | 5.3  | 11.9 |      | 5.9   |
| 28             |      | 5.0  | 15.3  |                | 5.0   |       | 8.9  | 9.3   |      | 5.5   | 5.0   | 5.0   |      | 9.8  | 15.9 |       | 5.0  | 7.4  |      | 9.7  | 72.0 | 7.8   |
| 32             | 5.4  | 5.0  | 14.6  | 7.9            | 5.0   | 5.5   | 7.8  | 6.3   | 6.3  | 5.0   | 5.0   | 6.0   |      | 17.6 |      |       | 5.0  | 8.0  | 6.5  | 5.5  | 89.8 | 6.0   |
| 36             | 6.4  | 5.0  | 13.2  | 8.6            | 5.0   | 5.6   | 7.2  | 6.6   | 5.0  | 6.0   | 5.0   | 5.0   | 7.8  | 6.1  | 7.4  |       | 5.1  | 9.8  | 5.2  | 6.8  |      | 6.4   |
| 40             |      | 5.0  | 15.4  | 6.5            | 5.0   | 5.0   | 7.8  | 5.7   | 5.2  | 5.4   |       | 7.7   | 5.0  | 7.7  | 5.9  |       | 5.0  | 7.5  | 6.4  | 8.6  |      | 6.8   |
| 44             | 7.6  | 5.0  | 15.2  | 5.0            | 5.0   | 5.7   | 6.6  | 6.4   | 5.4  | 6.5   | 7.4   | 27.4  | 5.9  | 5.2  | 7.0  |       | 5.7  | 7.8  | 5.3  | 6.3  | 34.6 | 8.3   |
| 48             | 5.2  | 5.0  | 9.1   | 5.0            | 5.0   | 6.6   | 5.4  | 5.8   | 5.0  | 11.4  | 6.3   | 6.1   | 6.1  | 6.2  | 8.3  |       | 6.0  | 8.1  | 6.9  | 5.9  | 37.1 | 11.5  |

<sup>A</sup>Values in ng/mL; LLOQ = 5.0 ng/mL; non-affected subjects 95%ile = 10.0 ng/mL

**Supplemental Table 2. CSF total HS in individual subjects over the course of study 250-201<sup>A</sup>**

| Treatment Week | 9001  | 9002  | 9003  | 9004           | 9005  | 9006  | 9007  | 9008  | 9009  | 9010  | 9011  | 9012  | 9013  | 9014  | 9015  | 9017  | 9018  | 9019  | 9020  | 9021  | 9022  | 9023  |
|----------------|-------|-------|-------|----------------|-------|-------|-------|-------|-------|-------|-------|-------|-------|-------|-------|-------|-------|-------|-------|-------|-------|-------|
| 1 (Part 1)     | 254.6 | 207.6 | 457.3 | Not applicable |       |       |       |       |       |       |       |       |       |       |       |       |       |       |       |       |       |       |
| 1 (Part 2)     | 100.0 | 100.0 | 148.3 | 567.7          | 508.8 | 529.9 | 217.0 | 752.0 | 380.8 | 393.4 | 385.5 | 493.3 | 368.2 | 337.9 | 235.2 | 368.3 | 216.6 | 261.0 | 273.3 | 410.8 | 439.4 | 335.3 |
| 2              |       | 100.0 |       |                | 128.2 |       | 127.7 |       |       | 188.2 | 188.3 | 157.6 | 164.1 | 135.6 | 125.9 | 174.9 | 100.0 |       | 114.7 | 142.1 | 147.0 | 114.1 |
| 3              | 100.0 | 100.0 | 137.7 | 124.6          |       | 103.9 | 104.4 | 146.7 | 110.5 | 195.9 | 127.3 | 104.0 | 112.1 | 100.0 | 101.8 | 105.5 |       | 100.0 | 100.0 | 103.3 |       | 100.0 |
| 4              | 100.0 | 100.0 | 144.8 | 100.0          | 100.0 | 100.0 | 100.0 |       | 100.0 | 167.7 | 108.0 | 100.0 | 100.0 | 105.2 | 100.0 | 116.0 |       | 100.0 | 100.0 | 100.0 | 111.7 | 100.0 |
| 5              | 100.0 | 100.0 | 107.4 | 100.0          | 100.0 |       | 100.0 | 107.8 | 100.0 | 100.0 | 100.0 | 100.0 | 100.0 | 100.8 | 104.5 | 100.0 |       | 191.7 |       | 100.0 | 100.0 | 100.0 |
| 6              | 100.0 | 100.0 |       |                |       | 100.0 | 100.0 | 100.0 | 100.0 | 100.0 | 100.0 | 100.0 | 100.0 | 121.7 | 103.6 | 100.0 |       | 100.0 | 100.0 | 100.0 | 109.9 | 100.0 |
| 7              | 100.0 | 100.0 | 106.2 | 100.0          | 100.0 | 100.0 | 100.0 | 100.0 | 100.0 | 100.0 | 100.0 | 100.0 | 100.0 | 101.5 | 104.0 | 108.5 |       | 100.0 | 131.6 | 100.0 | 137.0 | 100.0 |
| 8              | 100.0 | 100.0 | 217.0 | 100.0          | 100.0 | 100.0 | 100.0 | 105.0 | 100.0 | 100.0 | 100.0 | 100.0 | 100.0 | 110.7 | 100.0 | 128.2 |       | 103.3 | 145.3 | 100.0 | 167.1 | 100.0 |
| 12             | 100.0 | 100.0 | 108.2 | 106.6          | 100.0 | 100.0 | 100.0 | 115.9 | 100.0 | 100.0 | 100.0 | 100.0 | 100.0 |       | 112.6 |       |       | 165.1 | 100.0 | 100.0 | 160.8 | 100.0 |
| 16             | 100.0 | 100.0 | 150.2 | 114.1          | 100.0 | 100.0 | 100.0 | 118.9 | 100.0 | 113.2 | 100.0 | 140.2 | 100.0 | 100.0 | 100.0 |       | 223.2 | 112.9 | 100.0 | 100.0 |       | 100.0 |
| 20             | 100.0 | 100.0 | 126.6 | 100.0          | 100.0 | 100.0 | 100.0 | 132.4 | 100.0 | 100.0 | 100.0 |       | 100.0 | 100.0 | 100.0 |       | 100.0 | 116.7 |       | 100.0 |       | 100.0 |
| 24             | 100.0 | 100.0 | 100.0 | 100.0          | 100.0 |       | 100.0 | 100.0 | 100.0 | 100.0 | 100.0 | 151.0 | 100.0 | 100.0 | 146.0 |       | 100.0 | 100.0 | 100.0 | 117.5 |       | 100.0 |
| 28             |       | 100.0 | 116.1 |                | 100.0 |       | 100.0 | 101.4 | 100.0 | 100.0 | 100.0 | 100.0 |       | 133.5 | 112.8 |       | 100.0 | 100.0 |       | 106.0 | 374.3 | 100.0 |
| 32             | 100.0 | 100.0 | 119.8 | 100.0          | 100.0 | 100.0 | 100.0 | 100.0 | 108.3 | 100.0 | 100.0 | 100.0 |       | 195.0 |       |       | 100.0 | 100.0 | 100.0 | 100.0 | 352.0 | 100.0 |
| 36             | 100.0 | 100.0 | 118.1 | 100.0          | 100.0 | 100.0 | 100.0 | 100.0 | 100.0 | 100.0 | 100.0 | 100.0 | 100.0 | 100.0 | 100.0 |       | 100.0 | 100.0 | 100.0 | 100.0 |       | 100.0 |
| 40             |       | 100.0 | 128.3 | 100.0          | 100.0 | 100.0 | 100.0 | 100.0 | 100.0 | 100.0 |       | 111.6 | 100.0 | 100.0 | 100.0 |       | 100.0 | 100.0 | 100.0 | 125.2 |       | 100.0 |
| 44             | 100.0 | 100.0 | 120.4 | 100.0          | 100.0 | 100.0 | 100.0 | 142.5 | 100.0 | 100.0 | 126.9 | 158.2 | 100.0 | 100.0 | 100.0 |       | 100.0 | 100.0 | 100.0 | 101.6 | 170.5 | 100.0 |
| 48             | 100.0 | 100.0 | 100.0 | 100.0          | 100.0 | 100.0 | 100.0 | 100.0 | 100.0 | 118.2 | 104.5 | 100.0 | 100.0 | 100.0 | 100.0 |       | 100.0 | 100.0 | 100.0 | 100.0 | 183.7 | 100.0 |

<sup>A</sup>Values in ng/mL; LLOQ = 100.0 ng/mL; non-affected subjects 95%ile = 148.0 ng/mL

**Supplemental Table 3. Plasma HS-NRE level in individual subjects over the course of study 250-201<sup>A</sup>**

| Treatment Week | 9001 | 9002 | 9003 | 9004           | 9005 | 9006 | 9007 | 9008  | 9009 | 9010 | 9011 | 9012 | 9013 | 9014 | 9015 | 9017 | 9018 | 9019 | 9020 | 9021 | 9022 | 9023 |
|----------------|------|------|------|----------------|------|------|------|-------|------|------|------|------|------|------|------|------|------|------|------|------|------|------|
| 1 (Part 1)     |      |      | 71.7 | Not applicable |      |      |      |       |      |      |      |      |      |      |      |      |      |      |      |      |      |      |
| 1 (Part 2)     |      |      | 18.6 | 69.8           | 66.6 | 80.1 | 85.0 | 117.5 | 98.0 | 55.7 | 71.0 | 48.0 | 90.4 | 57.2 | 67.4 | 78.8 | 45.5 | 62.1 | 27.3 | 61.1 | 71.5 |      |
| 2              |      |      |      |                |      |      |      |       |      |      |      |      |      |      |      |      |      |      |      |      |      |      |
| 3              |      |      |      |                |      |      |      |       |      |      |      |      |      |      |      |      |      |      |      |      |      |      |
| 4              | 15.6 | 8.8  | 25.7 |                | 11.7 | 8.8  | 11.3 |       | 10.4 | 10.9 | 8.7  | 13.8 | 47.2 | 11.8 | 20.8 | 14.0 | 8.3  | 9.0  | 6.7  | 8.8  | 8.5  |      |
| 5              | 24.6 | 11.5 | 19.2 | 9.1            | 11.2 | 7.7  | 8.5  | 11.9  | 10.3 | 13.5 | 7.3  | 11.4 | 8.2  | 12.8 | 20.3 | 12.4 |      |      |      | 7.2  | 11.1 |      |
| 6              |      |      |      |                |      |      |      |       |      |      |      |      |      |      |      |      |      |      |      |      | 6.8  |      |
| 7              |      |      |      |                |      |      |      |       |      |      |      |      |      |      |      |      |      |      |      |      |      |      |
| 8              | 21.0 |      | 8.3  | 7.7            |      |      | 13.1 | 11.9  | 12.1 | 10.5 | 7.8  | 8.6  | 8.8  | 13.8 | 24.0 | 14.4 |      | 9.8  | 10.9 |      | 12.6 | 17.7 |
| 12             | 23.9 | 9.3  | 21.6 | 13.9           | 6.6  | 9.7  | 18.3 | 16.1  | 12.0 | 15.1 | 6.6  | 9.5  | 9.7  | 14.9 | 20.4 |      |      | 13.8 | 7.0  | 15.0 | 13.3 | 11.4 |
| 16             | 23.1 |      | 22.2 | 16.0           | 12.0 | 8.0  | 17.8 | 17.0  | 18.6 | 11.4 | 5.6  | 10.3 | 12.5 | 14.4 | 19.2 |      | 10.5 | 15.4 | 11.9 |      |      |      |
| 20             | 22.5 | 8.0  | 22.1 | 16.6           | 7.1  | 6.0  | 16.9 | 22.5  |      | 11.6 | 7.0  | 7.3  | 5.6  |      | 14.1 |      |      | 23.5 | 10.1 |      |      |      |
| 24             | 23.7 | 7.2  | 20.9 | 19.6           | 5.8  | 9.6  | 21.5 | 20.7  |      | 10.5 | 8.2  | 15.3 | 14.0 |      | 16.3 | 20.9 |      | 20.4 | 8.2  |      |      |      |
| 28             | 24.5 | 9.7  | 22.8 |                | 8.4  |      | 15.5 | 20.2  |      | 10.5 | 8.2  | 13.8 |      |      | 13.3 | 50.2 | 14.4 | 15.8 | 8.7  |      | 31.2 | 13.6 |
| 32             |      | 14.0 | 22.0 | 17.2           | 6.0  | 9.3  | 23.2 | 20.5  | 18.9 | 8.7  | 6.9  | 8.7  |      | 21.5 | 21.5 | 51.7 | 12.0 |      | 11.0 | 9.5  | 42.4 | 13.9 |
| 36             |      | 11.8 | 25.3 | 24.2           | 5.9  | 8.0  | 22.0 | 20.5  | 12.5 | 10.2 | 7.6  | 5.9  | 5.0  | 16.1 | 23.3 | 45.7 | 11.8 | 18.4 | 7.7  | 9.9  |      | 11.8 |
| 40             |      | 8.8  | 27.2 | 22.1           | 6.8  | 7.1  | 17.6 | 25.1  | 24.6 |      | 8.6  | 6.3  | 6.0  | 16.3 | 19.1 | 41.5 | 10.1 | 16.1 | 7.5  | 9.6  |      | 12.4 |
| 44             | 15.3 | 8.7  | 22.0 | 27.2           | 7.0  | 9.5  | 18.3 | 23.2  | 22.6 | 10.9 | 9.1  |      |      | 13.9 | 23.0 |      | 9.7  | 16.3 |      |      | 41.7 | 15.8 |
| 48             | 15.4 | 8.5  | 20.0 | 23.9           | 5.6  | 11.1 | 21.4 | 18.6  |      | 13.0 | 6.3  | 8.2  | 9.5  | 13.5 | 21.6 | 42.3 | 10.3 | 13.4 | 7.9  |      | 35.3 | 17.3 |

<sup>A</sup>Values in ng/mL; LLOQ = 5.0 ng/mL; non-affected subjects 95%ile = 15.0 ng/mL

**Supplemental Table 4. Plasma total HS in individual subjects over the course of study 250-201<sup>A</sup>**

| Treatment Week | 9001  | 9002  | 9003  | 9004           | 9005  | 9006  | 9007  | 9008  | 9009  | 9010  | 9011  | 9012  | 9013  | 9014  | 9015  | 9017  | 9018  | 9019  | 9020  | 9021  | 9022  | 9023  |
|----------------|-------|-------|-------|----------------|-------|-------|-------|-------|-------|-------|-------|-------|-------|-------|-------|-------|-------|-------|-------|-------|-------|-------|
| 1 (Part 1)     |       |       | 615.1 | Not applicable |       |       |       |       |       |       |       |       |       |       |       |       |       |       |       |       |       |       |
| 1 (Part 2)     |       |       | 264.7 | 629.1          | 652.9 | 765.8 | 815.3 | 984.8 | 928.5 | 658.9 | 780.6 | 575.7 | 548.7 | 756.1 | 692.2 | 712.3 | 457.8 | 603.9 | 302.3 | 536.7 | 810.6 |       |
| 2              |       |       |       |                |       |       |       |       |       |       |       |       |       |       |       |       |       |       |       |       |       |       |
| 3              |       |       |       |                |       |       |       |       |       |       |       |       |       |       |       |       |       |       |       |       |       |       |
| 4              | 230.6 | 233.3 | 356.1 |                | 205.2 | 225.8 | 212.6 |       | 244.4 | 291.9 | 218.4 | 274.2 | 227.7 | 273.2 | 316.4 | 305.5 | 196.5 | 193.2 | 129.9 | 169.8 | 291.0 |       |
| 5              | 287.2 | 263.4 | 302.9 | 174.2          | 240.8 | 182.4 | 189.0 | 244.6 | 221.5 | 308.5 | 186.0 | 233.0 | 227.7 | 265.9 | 286.5 | 246.0 | 180.7 |       |       | 152.5 | 287.3 |       |
| 6              |       |       |       |                |       |       |       |       |       |       |       |       |       |       |       |       |       |       |       |       | 100.0 |       |
| 7              |       |       |       |                |       |       |       |       |       |       |       |       |       |       |       |       |       |       |       |       |       |       |
| 8              | 283.1 |       | 182.6 | 149.3          |       |       | 231.1 | 223.4 | 296.2 | 246.5 | 190.7 | 195.4 | 180.2 | 270.7 | 286.7 | 289.5 |       | 194.3 |       |       | 295.4 | 286.5 |
| 12             | 306.4 | 237.5 | 372.5 | 207.9          | 145.8 | 197.4 | 271.8 | 267.3 | 228.4 | 306.9 | 173.4 | 171.2 | 190.0 | 255.7 | 260.7 |       |       | 228.3 | 144.0 | 231.4 | 246.1 | 205.8 |
| 16             | 263.1 |       | 342.6 | 218.6          | 267.0 | 179.4 | 292.9 | 292.4 | 314.0 | 237.8 | 154.6 | 202.3 | 140.9 | 257.8 | 259.3 |       |       | 266.1 | 155.3 |       |       |       |
| 20             | 322.3 | 197.3 | 355.0 | 230.7          | 155.0 | 127.5 | 266.3 | 347.4 |       | 228.2 | 165.5 | 179.7 | 165.0 |       | 248.1 |       |       | 337.8 | 145.4 |       |       |       |
| 24             | 284.3 | 214.7 | 304.4 | 239.5          | 130.1 | 199.4 | 282.8 | 266.9 |       | 241.6 | 157.4 | 222.9 | 263.4 |       | 231.2 | 443.9 |       | 310.5 | 140.9 |       |       |       |
| 28             | 286.9 | 215.0 | 371.1 |                | 169.9 |       | 262.3 | 292.1 |       | 220.6 | 145.0 | 253.5 |       |       | 288.8 | 507.5 | 215.8 | 244.9 | 165.5 |       | 465.5 | 258.7 |
| 32             |       | 342.5 | 310.0 | 241.2          | 123.9 | 180.6 | 283.2 | 279.1 | 331.2 | 213.5 | 145.3 | 178.9 |       | 314.2 | 319.9 | 526.8 | 230.2 |       | 203.0 | 188.3 | 599.5 | 284.5 |
| 36             |       | 283.4 | 377.0 | 277.5          | 147.9 | 184.2 | 257.5 | 304.0 | 284.8 | 226.4 | 143.2 | 152.2 | 116.2 | 288.4 | 307.5 | 481.0 | 220.5 | 262.1 | 143.6 | 201.7 |       | 242.0 |
| 40             |       | 217.5 | 445.1 | 263.7          | 140.5 | 184.5 | 259.9 | 338.9 | 375.7 |       | 136.1 | 165.4 | 136.3 | 260.7 | 318.0 | 437.9 | 220.2 | 226.9 | 148.2 | 203.4 |       | 252.5 |
| 44             | 243.5 | 258.4 | 370.8 | 276.2          | 126.7 | 184.8 | 273.1 | 309.0 | 321.2 | 209.4 | 128.3 |       |       | 259.1 | 370.9 |       | 177.5 | 258.1 |       |       | 661.9 | 274.5 |
| 48             | 229.9 | 221.0 | 283.3 | 305.4          | 136.6 | 216.2 | 279.1 | 285.9 |       | 197.0 | 126.4 | 166.6 | 150.2 | 247.8 | 405.5 | 566.3 | 201.7 | 283.1 | 137.0 |       | 455.5 | 287.7 |

<sup>A</sup>Values in ng/mL; LLOQ = 100.0 ng/mL; non-affected subjects 95%ile = 323.0 ng/mL

**Supplemental Table 5. Cortical grey matter, cerebellum and cerebral ventricle volumes in individual subjects over the course of study 250-201**

| Subject | Age at baseline (months) | Cortical grey matter (mL) |               |         |         | Cerebellum (mL) |               |         |         | Cerebral ventricles (mL) |               |         |         |
|---------|--------------------------|---------------------------|---------------|---------|---------|-----------------|---------------|---------|---------|--------------------------|---------------|---------|---------|
|         |                          | Week 1 Part 1             | Week 1 Part 2 | Week 24 | Week 48 | Week 1 Part 1   | Week 1 Part 2 | Week 24 | Week 48 | Week 1 Part 1            | Week 1 Part 2 | Week 24 | Week 48 |
| 9001    | 127                      | 268                       | 253           | 247     | 252     | 161             | 158           | 157     | 155     | 105                      | 137           | 134     | 134     |
| 9002    | 40                       | 532                       | 487           | 490     | 460     | 149             | 149           | 160     | 159     | 51                       | 63            | 75      | 84      |
| 9003    | 46                       | 621                       | 565           | 551     | 592     | 154             | 159           | 157     | 162     | 26                       | 21            | 22      | 20      |
| 9004    | 63                       |                           | 384           | 231     | 261     |                 | 164           | 170     | 172     |                          | 83            | 48      | 42      |
| 9005    | 59                       |                           | 585           | 547     | 545     |                 | 182           | 181     | 182     |                          | 24            | 39      | 35      |
| 9006    | 25                       |                           | 506           | 542     | 517     |                 | 131           | 137     | 141     |                          | 36            | 39      | 31      |
| 9007    | 46                       |                           | 486           | 397     | 334     |                 | 147           | 149     | 144     |                          | 55            | 85      | 65      |
| 9008    | 64                       |                           | 492           | 414     | 401     |                 | 141           | 139     | 138     |                          | 27            | 34      | 36      |
| 9009    | 93                       |                           | 478           | 384     | 393     |                 | 143           | 134     | 139     |                          | 38            | 58      | 54      |
| 9010    | 64                       |                           | 399           | 331     | 285     |                 | 127           | 124     | 126     |                          | 50            | 83      | 121     |
| 9011    | 47                       |                           | 439           | 352     | 367     |                 | 151           | 142     | 142     |                          | 25            | 35      | 32      |
| 9012    | 69                       |                           | 586           | 518     | 605     |                 | 172           | 180     | 180     |                          | 15            | 24      | 20      |
| 9013    | 64                       |                           | 415           | 312     | 352     |                 | 172           | 164     | 166     |                          | 28            | 87      | 128     |
| 9014    | 62                       |                           | 422           | 358     |         |                 | 142           | 145     | 150     |                          | 23            | 22      | 29      |
| 9015    | 71                       |                           | 412           | 405     |         |                 | 154           | 152     | 160     |                          | 39            | 49      | 40      |
| 9017    | 43                       |                           | 475           | 382     | 421     |                 | 152           | 157     | 164     |                          | 35            | 30      | 28      |
| 9018    | 69                       |                           | 590           | 583     | 574     |                 | 138           | 145     | 141     |                          | 22            | 39      | 40      |
| 9019    | 53                       |                           | 455           | 433     | 423     |                 | 131           | 133     | 132     |                          | 55            | 70      | 70      |
| 9020    | 118                      |                           | 343           | 347     |         |                 | 128           | 135     |         |                          | 23            | 29      |         |
| 9021    | 44                       |                           | 480           | 391     | 402     |                 | 129           | 134     | 78      |                          | 48            | 64      | 63      |
| 9022    | 61                       |                           | 522           |         | 467     |                 | 142           |         | 151     |                          | 14            |         | 20      |
| 9023    | 31                       |                           | 473           | 409     | 402     |                 | 143           | 142     | 149     |                          | 64            | 99      | 92      |

## **Appendix 1.**

### **Algorithm for the Choice of Cognitive Test (BSID-III vs KABC-II)**

Each subject is designated to one of the testing instruments (KABC-II or BSID-III) at Screening. It is hoped that the designated test will remain appropriate at each visit for the full trial duration. However, it is possible that a subject designated to KABC-II may demonstrate disease progression and lose the ability to perform the KABC-II, necessitating a switch to the BSID-III. Conversely, it is possible that a younger subject may outgrow the BSID-III and need to switch to the KABC-II in order to measure her/his higher functioning. The guidelines for switching tests are as follows:

- For subjects designated to the KABC-II test, testing at each visit begins with the KABC-II Triangles subtest.

If the subject successfully performs 2 or more items, the KABC-II will continue to be used during the current visit and at the subsequent visit.

If the subject cannot successfully perform 2 or more items on the Triangles subtest, the rater should try one other nonverbal subtest of the KABC-II; if the subject successfully performs 3 or more items on the subtest, the KABC-II should continue to be used for the current visit and for the subsequent visit. If not, the KABC-II will be discontinued, and the BSID-III will be administered to the subject at this visit and at the subsequent visit.

- “For subjects designated to the KABC-II test, if the subject achieves the lowest age equivalent score (< 36 months) on any nonverbal subdomain AND has all other nonverbal subdomain scores ≤ 42 months, the subject will be switched to the BSID-III at the subsequent visit.

- “For subjects designated to the KABC-II test, if the subject achieves the lowest age equivalent score (< 36 months) on any nonverbal subdomain AND has at least one other nonverbal subdomain score > 42 months, the subject will continue to be tested with the KABC-II at the subsequent visit.”
- For subjects designated to the BSID-III test, if the subject successfully achieves the highest age equivalent score on the Cognitive domain (> 42), the subject will be switched to the KABC-II at the subsequent visit.
